# Supplementary material for: Snow Water Equivalent Change Mapping from Slope Correlated InSAR Phase Variations
Source: Copernicus journal article supplement (doi:10.5194/tc-2021-359), 2021-12-15
Supplement: Supplementary file 1 [file tc-2021-359-supplement.pdf]

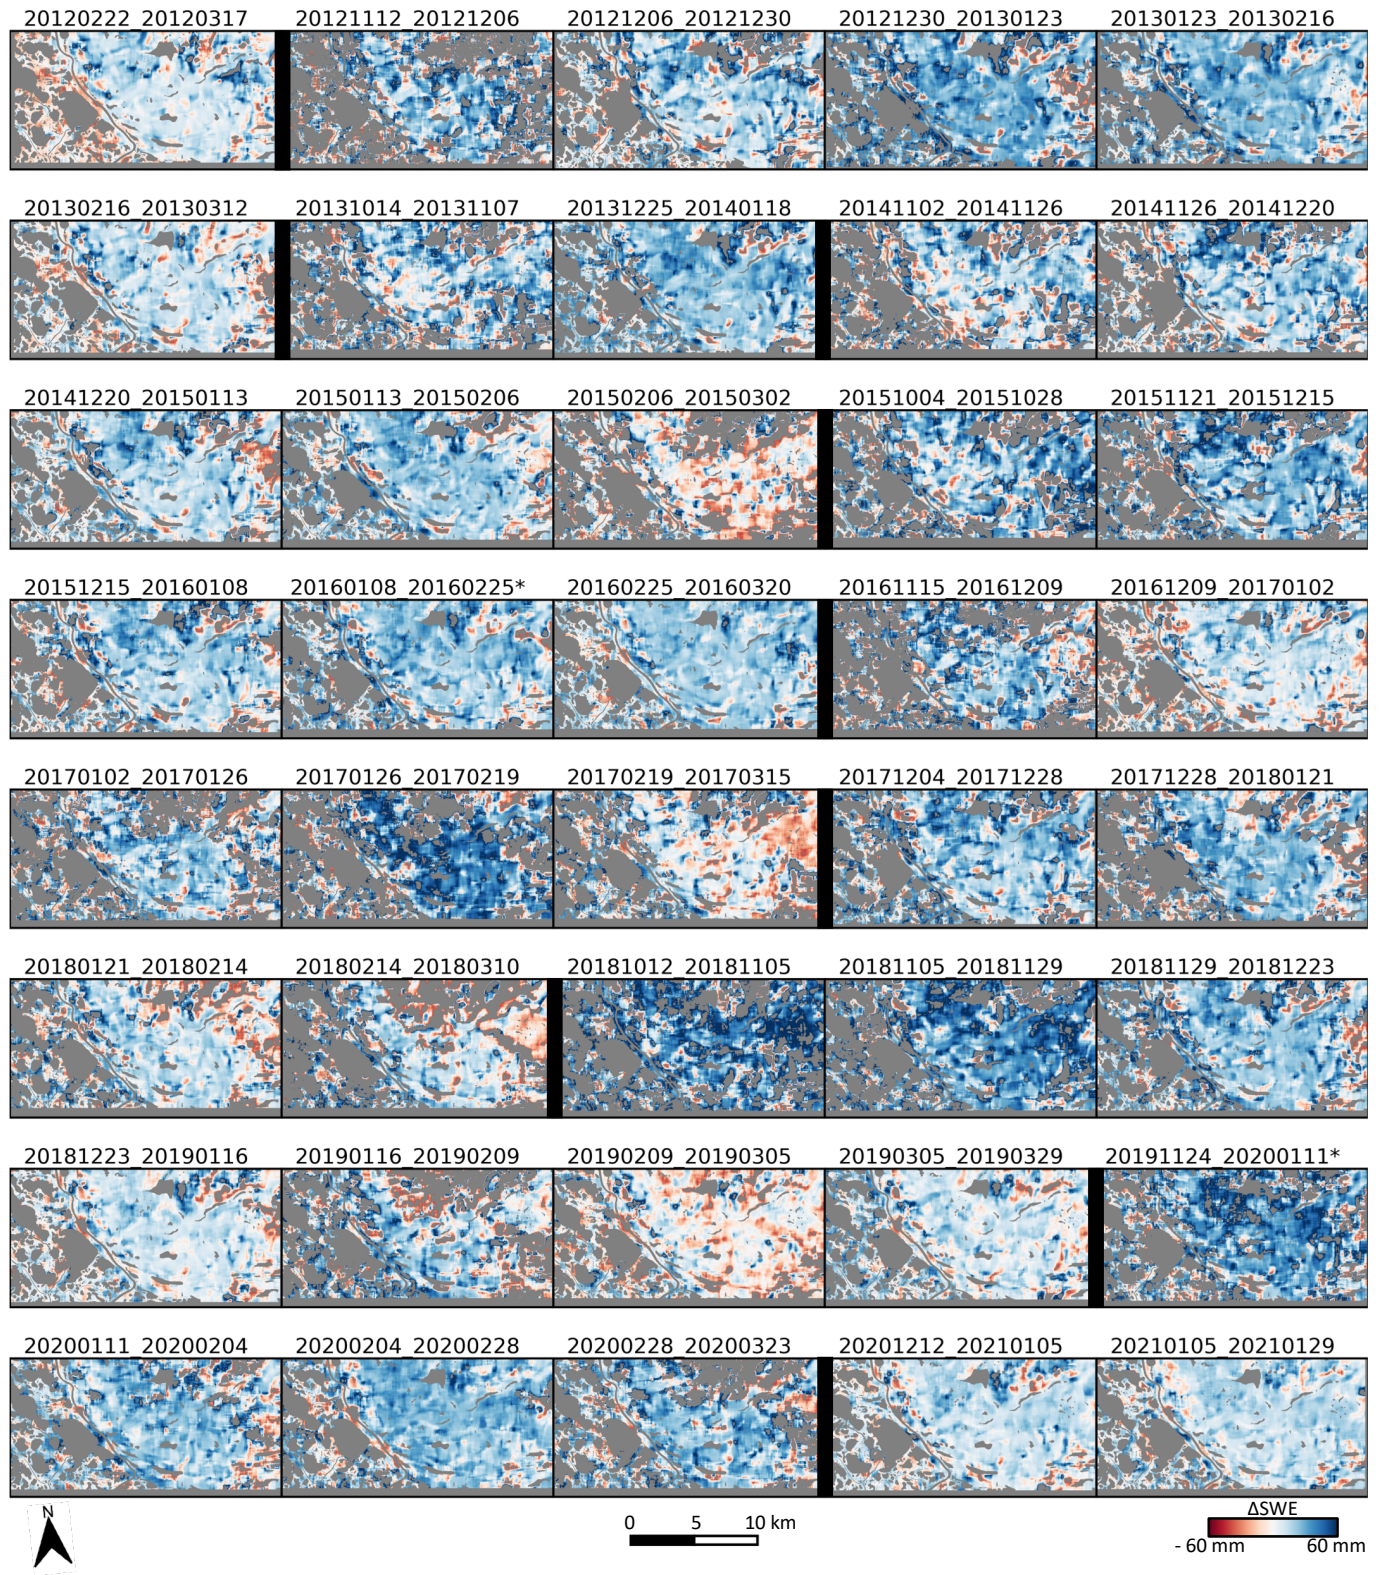

**Figure S1.** Dry-snow season  $\Delta$ SWE maps (both images in each pair acquired Oct 1 – Mar 31) estimated with the SlopeVar estimator. Water areas and points with no solution in the  $\Delta$ SWE search range are greyed out. Vertical black bars separate the dry-snow seasons. Maps span 24-days except for two that span 48-days (labeled with ‘\*’) due to images not acquired.
